# Supplementary material for: Hierarchical SiO2@Bi2O3 core/shell electrospun fibers for infrared stealth camouflage
Source: Royal Society of Chemistry journal article supplement (doi:10.1039/c4tc01873g), 2014-11-07
Supplement: c4tc01873g1.pdf [file c4tc01873g1.pdf]

## Supporting Information

### **Hierarchical SiO<sub>2</sub>@Bi<sub>2</sub>O<sub>3</sub> Core/Shell Electrospun Fibers for Infrared Stealthy Camouflage**

Xinfang Liu,<sup>a</sup> Yuekun Lai,<sup>a,c</sup> Jianying Huang,<sup>a</sup> Salem S. A-Deyab<sup>b</sup> and Ke-Qin  
Zhang<sup>a,c\*</sup>

<sup>a</sup>*National Engineering Laboratory for Modern Silk, College of Textile and Clothing  
Engineering, Soochow University, Suzhou, Jiangsu 215123, China.*

<sup>b</sup>*Department of Chemistry, College of Science, King Saud University, Riyadh 11451,  
Saudi Arabia.*

<sup>c</sup>*Research Center of Cooperative Innovation for Functional Organic/Polymer  
Material Micro/Nanofabrication, Soochow University, Suzhou, Jiangsu 215123,  
China.*

\*Corresponding author's email: kqzhang@suda.edu.cn.

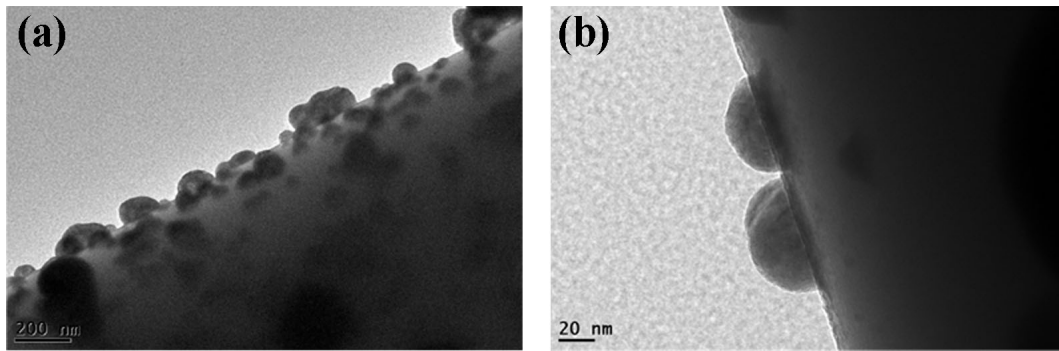

**Figure S1.** TEM images of  $\text{SiO}_2@\text{Bi}_2\text{O}_3$  composite fibers calinated at 400 °C, which show that  $\text{Bi}_2\text{O}_3$  nanoparticles only distribute on the surface of  $\text{SiO}_2$  fibers.
